1 **Effects of cardiovascular disease risk factors on cardiorespiratory fitness in**  
2 **firefighters – a protocol for a systematic review and meta-analysis**

3

4 Jaron Ras,<sup>1\*</sup> Elpidoforos S. Soteriades,<sup>2</sup> Andre P. Kengne,<sup>3</sup> Denise Smith,<sup>4</sup> Lloyd Leach<sup>1</sup>

5

6 <sup>1</sup> Department of Sport, Recreation and Exercise Science, Faculty of Community and Health Sciences, University  
7 of the Western Cape, Cape Town, South Africa.

8 <sup>2</sup> School of Economics and Management, Healthcare Management Program. Open University of Cyprus, Nicosia,  
9 Cyprus.

10 <sup>3</sup> Non-communicable Diseases Research Unit, South African Medical Research Council, Cape Town, South  
11 Africa.

12 <sup>4</sup> Health and Human Physiological Sciences, Skidmore College, Saratoga Springs, New York.

13

14 \*Corresponding author:

15 Department of Sport, Recreation and Exercise Science, Faculty of Community and Health  
16 Sciences, University of the Western Cape, Cape Town, South Africa. Jaron Ras

17 Email: [3405618@myuwc.ac.za](mailto:3405618@myuwc.ac.za)

18

19 **Conflict of Interest:** The authors have no conflict of interest.

20

21 **Funding:** The Ryoichi Sasakawa Young Leaders Fellowship Fund (Sylff) Program and the  
22 National research foundation (NRF) (grant number: 141282)

23

24

25

26

27

28

29

30

31

32

33

34 **NOTE:** This preprint reports new research that has not been certified by peer review and should not be used to guide clinical practice.

35 **Abstract**

36 **Introduction:** Globally, firefighting is recognized as among the most physically demanding professions. In  
37 addition, because of the hazardous nature of firefighting, firefighters are required to wear heavy insulated  
38 personnel protective equipment that protects them from exposures to hazardous chemicals and fumes and severe  
39 temperatures. This requires that, throughout their careers, firefighters maintain their cardiovascular health and  
40 maintain a satisfactory cardiovascular fitness to manage these stressors and perform their duties sufficient vigour.  
41 The aim of this systematic is to determine the effects of cardiovascular disease risk factors on cardiorespiratory  
42 fitness of firefighters.

43 **Methods:** Using the comprehensive search terms, a detailed literature search, with no limitation to publication  
44 year, will be conducted to identify relevant studies from PubMed/Medline, Web of Science, EBSCOHost,  
45 ScienceDirect and SCOPUS. Data-extraction will be extracted using a researcher-generated data extraction form.  
46 Data will be imported into Zotero® version 6.0.9, and duplicates removed. The article screening will be conducted  
47 using the Rayyan® intelligent systematic review tool. Thereafter, information from the included studies will be  
48 captured on the researcher-generated data extraction form. For the methodological assessment, the Appraisal Tool  
49 for Cross Sectional Studies (AXIS) checklist and the Critical Appraisal Skills Programme (CASP) toolkit will be  
50 used. For the meta-analysis, Review Manager 5.3 will be used to determine the exposure effects and MedCalc®  
51 statistical software Ltd. to determine the pooled correlation effects.

52 **Discussion:** This systematic review arose from the global cardiovascular health concerns that firefighters face,  
53 and how the development and progression of CVD risk factors effect cardiorespiratory fitness in firefighters.  
54 Cardiorespiratory has been shown to be an essential factor in optimal occupational performance in firefighters but  
55 understudied related to CVD risk factors. It is anticipated that this review will make a considerable contribution  
56 to the international scientific literature on the effect that CVD risk factors will have on cardiorespiratory fitness.

57  
58 **Systematic review protocol registration:** PROSPERO (CRD42021258898)

59  
60 **Keywords:** Firefighters, cardiovascular disease, cardiorespiratory fitness, risk factors, Dyslipidaemia, obesity,  
61 hypertension, cigarette smoking.

62  
63  
64  
65  
66  
67  
68  
69  
70  
71  
72

## 73 INTRODUCTION

74 Globally, firefighting is recognized as among the most physically demanding professions [1–  
75 4]. In addition, because of the hazardous nature of firefighting, firefighters are required to wear  
76 heavy insulated personnel protective equipment that protects them from exposures to hazardous  
77 chemicals and fumes and severe temperatures [1–4]. The full PPE worn with the self-contained  
78 breathing apparatus (SCBA) may weigh up to 29.3 kg, which places significant strain on the  
79 cardiovascular system [1]. It has been shown that firefighters routinely exceed their age  
80 predicted maximal heart rates while performing work-related duties [5–7], which significantly  
81 predisposes firefighters to sudden cardiac events while on duty [3,4,8], which may account for  
82 the high mortality rates in this population.

83  
84 Studies have shown that numerous firefighters have multiple cardiovascular disease (CVD)  
85 risk factors, with the most prevalent risk factors being obesity, cigarette smoking, dyslipidemia,  
86 and physical inactivity [9–15]. This is a concern given the physically strenuous occupation of  
87 firefighting [2–4,8]. Numerous studies have reported that firefighters have an inadmissibly high  
88 percentage of mortality due to cardiovascular related incidents, with the preponderance of these  
89 events related to underlying CVD risk factors [4,8,16]. An additional factor contributing toward  
90 the high prevalence of cardiovascular-related mortality is inadequate physical fitness, which  
91 results in increased cardiovascular strain and overexertion [17,18]. Firefighters are, therefore,  
92 required to remain in peak cardiorespiratory conditioning, while maintaining good CVD health  
93 throughout their careers [4,8,17]. Firefighters that have multiple CVD risk factors, and have  
94 suboptimal cardiorespiratory conditioning, are not only at risk for sustaining a SCE while on  
95 duty, but also at risk for endangering the public they serve to protect [4,8,16,17].

96  
97 This study arose from the difficulties that firefighters routinely encounter, both globally and,  
98 in particular, locally in South Africa [12,19]. A disconcerting quantity of firefighters are at  
99 increased CVD risk and have poor cardiorespiratory fitness levels, which negatively impacts  
100 their overall health, well-being, and occupational performance [20–24]. The development of  
101 these CVD risk factors diminish firefighters ability to cope with the physical strain of  
102 firefighting, that has been described as being comparable to the demands placed on elite  
103 sportspersons [25]. It has been shown, in previous systematic reviews, that CVD risk factors  
104 are significantly related to cardiorespiratory fitness [26–29]. However, to the best of the authors  
105 knowledge, no systematic review and meta-analysis has investigated the effect of CVD risk  
106 factors on cardiorespiratory fitness in firefighters, which motivated the current systematic

107 review. One of the intentions of this review was to assist in informing policy change in South  
108 Africa, specifically on the need for remedial action and the development of strategies to  
109 enhance and maintain the cardiorespiratory fitness levels and cardiovascular wellbeing of  
110 firefighters.

111

## 112 **METHODS AND ANALYSIS**

### 113 **Study Design**

114 This protocol was registered in the PROSPERO (International prospective register of  
115 systematic reviews), with the registration number CRD42022330510. The systematic review  
116 protocol is reported in accordance with the Preferred Reporting Items for Systematic Review  
117 and Meta-Analysis Protocol (PRISMA-P). The systematic review methodology will be  
118 conducted in accordance with the guidelines Meta-analysis of Observational Studies in  
119 Epidemiology studies (MOOSE) and Quality of Reporting of Meta-analysis (QUOROM)  
120 [30,31]. When considering studies for this review, the PRISMA guidelines will be followed.

121

122 The authors have chosen to investigate the effect of CVD risk factors on cardiorespiratory  
123 fitness in adult, full-time firefighters. The focus of this review will be to determine the effect  
124 of CVD risk factors on cardiorespiratory fitness of firefighters. A quantitative systematic  
125 review is the preferred study design for this review [32].

### 126 **Aim of the Review**

127 The aim of this systematic review is to determine the effects of cardiovascular disease risk  
128 factors on the cardiorespiratory fitness of firefighters.

129

### 130 **Research Question**

131 What effects do cardiovascular disease risk factors have on the cardiorespiratory fitness of  
132 firefighters?

### 133 **Objectives of the Review**

134 The objective of the study is to investigate the effects of cardiovascular disease risk factors  
135 on the cardiorespiratory fitness of firefighters.

136

### 137 **Participants**

138 Full-time, part-time and volunteer firefighters 18 years and older.

139

## 140 **Exposure Types**

141 Cardiovascular disease risk factors in relation to the cardiorespiratory fitness of firefighters.

142

## 143 **Outcome Types**

144 i. Cardiovascular disease risk factors related to the cardiorespiratory fitness of  
145 firefighters.

146

## 147 **Search Strategy for Identification of Studies**

148 Using the comprehensive search terms, a detailed literature search will be conducted to identify  
149 studies investigating the effects of cardiovascular disease risk factors on the cardiorespiratory  
150 fitness of firefighters. Details on the inclusion and exclusion criteria for the systematic review  
151 is contained in Table 1:

152 The team of reviewers responsible for study identification will be made up of three main  
153 contributors:

154 i. Reviewer I (JR) will be the primary investigator. JR will assume responsibility for all  
155 aspects of the review and will be one of the reviewers tasked with conducting the  
156 literature search, independently extracting the data, responsible for verifying the data  
157 collected, analysing the results, grading the quality of the data, and write up of the first  
158 draft of the systematic review.

159 ii. Reviewer II (RN) will be the second reviewer and be tasked with independently  
160 conducting a literature search, extracting the data of studies, validating the data collected,  
161 and grading the quality of the data.

162 iii. Reviewer III (LL) will serve as the adjudicator and resolve any disagreements between  
163 the two independent reviewers.

164

165 Table 1: Inclusion and exclusion criteria of studies.

| <b>Inclusion Criteria</b>                                                                                                                                    | <b>Exclusion Criteria</b>                                             |
|--------------------------------------------------------------------------------------------------------------------------------------------------------------|-----------------------------------------------------------------------|
| i. Studies that included full-time, part-time and volunteer adult firefighters between the ages of 18 and 65 years, with no limitations to publication year. | i. Studies not focusing on cardiorespiratory fitness as the outcomes. |

|                                                                                                                             |                                                                                        |
|-----------------------------------------------------------------------------------------------------------------------------|----------------------------------------------------------------------------------------|
| ii. Observational studies, such as cross-sectional, cohort and case controlled, and experimental study designs.             | ii. Studies not focusing on cardiovascular disease risk factors as the main exposures. |
| iii. Studies investigating the effects of cardiovascular disease risk factors on cardiorespiratory fitness in firefighters. | iii. Systematic reviews or other types of reviews.                                     |
|                                                                                                                             | iv. Articles that are non-English.                                                     |

166

167 *Electronic Literature Search*

168 Using the comprehensive search terms, an extensive literature search will be conducted to  
 169 enable the capturing of as many relevant articles as possible to be included in the systematic  
 170 review and meta-analysis, however, these studies will be limited to English papers only. The  
 171 academic journal databases that will be searched will include PubMed/Medline, Web of  
 172 Science, SCOPUS, ScienceDirect and EBSCOhost. The literature search will take place  
 173 between August and September 2022. In addition, there will be no limitation to publication  
 174 year to allow inclusivity. The comprehensive search strategy will include the arrangement of  
 175 keywords and medical subject heading (MeSH) in various arrangements depending on the  
 176 specific database searched. In Table 2, the various arrangements of each of the search terms  
 177 for the population and the cardiovascular disease risk factors will be combined with each of  
 178 the outcome terms. The search strategies for the other databases are presented in Appendix 1.

179

180 Table 2: Search strategy developed in PubMed.

| Search # | Search terms                                                                                                                                                                                                                                                                                                                                                                                                                                                                                                                                                                                                                                                                                                                                                                                                                     |
|----------|----------------------------------------------------------------------------------------------------------------------------------------------------------------------------------------------------------------------------------------------------------------------------------------------------------------------------------------------------------------------------------------------------------------------------------------------------------------------------------------------------------------------------------------------------------------------------------------------------------------------------------------------------------------------------------------------------------------------------------------------------------------------------------------------------------------------------------|
| #1       | “firefighter” OR “fire and rescue” OR “fire and rescue personnel” OR “fire fighters” OR “fire fighter” OR “firefight”                                                                                                                                                                                                                                                                                                                                                                                                                                                                                                                                                                                                                                                                                                            |
| #2       | ("cardiovascular" [All Fields] AND "system" [All Fields])" OR cardiovascular system"[MeSH] OR "cardiovascular system" [All Fields] OR "cardiovascular*" [All Fields] OR "cardiovascular abnormalities" [MeSH] OR “heart rate variability” [All Fields] OR “HRV” [All Fields] OR “Heart Rate Interval” [All Fields] OR “cycle length variability” [All Fields] OR “RR variability” [All Fields] OR “heart period variability” [All Fields] OR “autonomic function” [All Fields] OR “vagal control” [All Fields] OR “lipid profile” [All Fields] OR “cholesterol” [MeSH] OR “dyslipidaemia” OR “dyslipidaemia” OR “hypercholesteremia” OR “diabetes” AND “mellitus” OR “blood glucose” OR “age” OR “aging” OR “age-group” OR “obesity” OR “central obesity” OR “waist circumference” OR “hypertension” OR “high blood pressure” OR |

|    |                                                                                                                                                                                                                                                                                                                                                                     |
|----|---------------------------------------------------------------------------------------------------------------------------------------------------------------------------------------------------------------------------------------------------------------------------------------------------------------------------------------------------------------------|
| #3 | "blood pressure" OR "metabolic syndrome" OR "hyperglycaemia" OR "cardiometabolic" OR "metabolic syndrome" OR "MetSyn"                                                                                                                                                                                                                                               |
| #3 | "physical fitness"[MeSH] OR "fitness" OR "exercise" [All Fields] OR "physical exertion" [All Fields] OR "muscular strength" OR "muscular endurance" OR "aerobic fitness" OR "cardiorespiratory fitness" OR "cardiorespiratory capacity" OR "VO <sub>2</sub> max" OR "aerobic fitness" OR "power" OR "anaerobic power" OR "aerobic capacity" OR "anaerobic capacity" |
| #4 | (#1 AND #2) OR (#1 AND #3) OR (#1 AND #2 AND #3)                                                                                                                                                                                                                                                                                                                    |

181

182

### 183 **Study Selection**

184 Initially, the electronic database search will be performed to acquire all eligible research papers.

185 All studies that meet the inclusion criteria will be selected for full-text screening. Authors will

186 be contacted in the instance where data is missing or where a full-text is not available.

187 Subsequently, the full-text articles will be assessed independently by the two principal

188 reviewers (JR and RN), using the Rayyan® intelligent systematic review (RIS) tool [33]. When

189 screening and categorizing the studies, three categories will be used, specifically, included,

190 excluded and unsure. Where uncertainties in study inclusion or study grading, the dispute will

191 be discussed between the two reviewers, and in the event of disagreement, the adjudicator (LL)

192 will resolve the dispute.

193

#### 194 *Selection and Screening of Articles*

195 Firstly, all relevant, pre-selected databases will be searched to identify and, initially, screen the

196 titles and abstracts of potential studies for eligibility. Secondly, the search outputs will be

197 downloaded and compiled in a reference software, namely, Zotero® version 6.0.9 and thirdly,

198 the reference software will be used to remove duplicate studies. Fourthly, the studies remaining

199 after the removal of duplicates, will be screened against the inclusion criteria to determine the

200 final studies for inclusion in the review and meta-analysis. Next, data will be extracted from

201 the included studies using a standard data extraction form. Lastly, studies included into the

202 meta-analysis will be analysed and interpreted using Review Manager 5.3[34] and MedCalc®

203 statistical software Ltd.

204

### 205 **Data Management**

206 All data that will be extracted from the initially selected studies will be captured using an initial  
207 electronic researcher-generated data extraction form (Appendix 2), by the two principal  
208 reviewers, in order to retrieve the key characteristics of each study. Thereafter, a detailed  
209 second data extraction form (Appendix 3) will be used to capture information of the included  
210 studies. The study data that will be extracted will include the general details of the study, such  
211 as the study title, authors, publication date, study design and the country of origin, the  
212 exposures evaluated, and the outcome measured. Thereafter, characteristics of the included  
213 studies will be collected, such as the sample size and method of sampling, participants details  
214 (age, height, weight, body mass index, cardiorespiratory fitness, gender). Lastly, the details of  
215 exposures and the outcome variables will be extracted, i.e., the research paper must report on  
216 at least one of the CVD risk factors under investigation in relation to cardiorespiratory fitness.

217

### 218 *Critical Appraisal of Included Studies*

219 Two critical appraisal tools will be used for this systematic review and meta-analysis, namely,  
220 The Critical Appraisal Skills Programme (CASP) toolkit (Middle Way, Oxford, UK) and the  
221 Appraisal Tool for Cross Sectional Studies (AXIS) checklist [35] (Table 2) ([https://casp-](https://casp-uk.net/casp-tools-checklists/)  
222 [uk.net/casp-tools-checklists/](https://casp-uk.net/casp-tools-checklists/)) to conduct the methodological quality assessment of each study  
223 that was included. The CASP toolkit and the AXIS toolkit was shown to be a reliable and valid  
224 tool for assessing the quality of cross-sectional studies [35,36]. For the grading of each study,  
225 where questions can be answered dichotomously, an article will be awarded a yes, denoted as  
226 a “□”, and when scored a no, an “×” will be denoted. For questions that require written grading,  
227 all attempts will be made to adapt the question to a dichotomous scale, and if a rating is not  
228 possible, the question will be excluded from the checklist. For questions that are not relevant,  
229 an “na” will be given.

230

### 231 **Data Synthesis and Meta-Analysis**

232 Data synthesis will commence once all relevant details of each study has been captured.  
233 Initially, a systematic synthesis of the results will be used to integrate the findings, narratively,  
234 from the various studies. This method will be used initially as it allows the researcher to  
235 identify, evaluate, and summarize study findings that are similar across all relevant studies [37–  
236 39]. Thereafter, data will be captured, quantitatively, and analysed using a meta-analysis.

237

### 238 *Meta-Analysis*



239 Where there is sufficient reporting and the data permits, a meta-analysis will be conducted. For  
240 each study, quantitative data will be pooled to determine the pooled effect estimate [40]. For  
241 dichotomous data, the odds ratio (OR) and risk ratio (RR) will be generated, whereas for  
242 continuous data, the mean difference (MD) and standardized mean difference (SMD) of  
243 estimation will be used to estimate the effect of each cardiovascular disease risk factor on  
244 cardiorespiratory fitness of firefighters [41]. The data will be imported and analysed using the  
245 Review Manager 5.3 [34,39,41,42], using the inverse method of meta-analysis [40]. In  
246 addition, a meta-analysis of correlations will be performed to determine the relationship  
247 between continuous CVD risk factors and cardiorespiratory fitness of firefighters. To perform  
248 the analysis, the MedCalc® statistical software Ltd. (version 20.104) will be preferred [40].  
249 The meta-analysis will involve using the original sample sizes and r values to generate the  
250 pooled r values between each cardiovascular risk factor in relation to cardiorespiratory fitness  
251 [40]. Using the Fisher's r to z transformation the original r values will be converted to a  
252 common test metric [40]:

253

$$254 \quad Z_{ri} = \frac{1}{2} \ln \left( \frac{1 + r_i}{1 - r_i} \right) \quad S_{\frac{z}{z}} = \frac{1}{n - 3}$$

255

256 The following will be used to indicate the strength of correlation [40]:

- 257 1. Very high correlation: 0.90 to 1.00 (−0.90 to −1.00).
- 258 2. High correlation: 0.70 to 0.90 (−0.70 to −0.90).
- 259 3. Moderate correlation: 0.50 to 0.70 (−0.50 to −0.70).
- 260 4. Low correlation: 0.30 to 0.50 (−0.30 to −0.50).
- 261 5. Negligible correlation: 0.00 to 0.30 (−0.00 to −0.30).

262

### 263 *Assessment of Heterogeneity*

264 Heterogeneity will be evaluated, initially, through visual inspection of the forest plot, to  
265 judge the extent of overlap. In addition, to quantitatively assess the heterogeneity, the Chi-  
266 square test and the I<sup>2</sup> test will be used [60]. The following will be used to explain I<sup>2</sup> statistics:  
267 1) 0% to 30% not be important; 2) 31% to 60% moderate heterogeneity; 3) 61% to 80%  
268 substantial heterogeneity; and 4) 81% to 100% considerable heterogeneity [40,42].

269

270 In the instance where substantial and considerable heterogeneity is found, potential reasons

271 will be determined by performing a subgroup analysis. A meta-analysis will be favoured by  
272 a low degree of heterogeneity [60]. Where significant heterogeneity is present, then a  
273 descriptive analysis of the results will be presented. If homogeneity is found between the  
274 studies, then a fixed-effects model will be preferred, and if heterogeneity is present, a  
275 random-effects model will be preferred [60].

276

### 277 *Subgroup Analysis and Investigation of Heterogeneity*

278 The following characteristics are expected to introduce significant clinical heterogeneity, i.e.,  
279 firefighters' age, gender, experience, methods of measuring CVD risk factors, type of testing  
280 procedure used to assess cardiorespiratory fitness, and plan to implement subgroup analysis on  
281 these variables, if possible. Although all exposures and outcomes will be measured using  
282 standardized instruments and protocols, the protocols preferred by each study may be different.  
283 This will necessitate the comparison and conversion of certain variables to produce analogous  
284 findings for comparison. The authors will use Review Manager for the subgroup analysis  
285 [39,41,42], and MedCalc® statistical software Ltd.[40] if adequate numbers of included studies  
286 are available.

287

### 288 *Publication Bias*

289 Publication bias will be assessed visually using the Begg's funnel chart. Thereafter,  
290 quantitative analysis will be conducted to assess the possibility of publication bias using the  
291 Egger's test and Begg's test [40].

292

### 293 *Presenting and Reporting of Results*

294 The results generated will be presented using a combination of figures, graphs, and tables. The  
295 presentation will include the method involved in study selection, exclusion and inclusion, using  
296 the PRISMA guidelines [32]. In addition, forest plots, funnel charts and summary tables will  
297 be created to present the data.

298

## 299 **DISCUSSION**

300 To the best of the authors' knowledge, no conclusive evidence currently exists on the effect of  
301 CVD risk factors and cardiorespiratory fitness of firefighters. This systematic review arose  
302 from the global cardiovascular health concerns that firefighters face, and how the development  
303 and progression of CVD risk factors effect cardiorespiratory fitness in firefighters.  
304 Cardiorespiratory has been shown to be an important factor in optimal occupational

305 performance in firefighters, but understudied [21,43–45]. The results of this review is expected  
306 to make a significant contribution to the international scientific literature on the effect that CVD  
307 risk factors will have on cardiorespiratory fitness. In addition, the results of this review will  
308 assist policy makers in implementing policy changes, particularly in developing countries, such  
309 as South Africa, but also globally, to promote the wellbeing, health, and career longevity of  
310 firefighters. Moreover, the planned review will support researchers design original studies  
311 relating to this issue and, assist in identifying gaps in the research for further studies.

312

313 As with all research, there are inherent limitations in the current systematic review and meta-  
314 analysis protocol when interpreting the findings. One limitation of this study is that only  
315 English studies will be used, which may result in the exclusion of potentially relevant studies.  
316 Another limitation is that there may be considerable heterogeneity between studies, due to  
317 differences in study population age, gender and the method used to assess cardiorespiratory  
318 fitness. There are, however, several strengths of this study, one of which being that this review  
319 will be guided by reference methodologies to ensure that a high standard of quality is  
320 maintained throughout the review process. The exclusion of a publication date limit is a  
321 strength of this review, removing the possibility of high-quality studies being excluded due to  
322 falling outside the publication limit. Lastly, the inclusion of all study designs, using various  
323 study methodologies, in this review.

324

### 325 **Ethics and Dissemination**

326 This study has been registered onto PROSPERO (CRD42022330510) and has been granted  
327 ethical clearance by the University of the Western Cape (BM21/10/9). Because a systematic  
328 review and meta-analysis will be conducted, there will be no direct engagement with human  
329 participants. Freely accessible and published data will be used in the study and, therefore, no  
330 confidentiality or ethical procedures need to be considered for this review [46]. The  
331 information gathered will be presented to local firefighter organisations and health  
332 departments, at conferences and in webinars. Furthermore, the systematic review and meta-  
333 analysis will be published in an accredited peer-reviewed journal. Lastly, this protocol will  
334 form a chapter of a doctoral thesis.

335

### 336 **AUTHOR CONTRIBUTIONS**

337 **Conceptualisation:** Jaron Ras

338 **Data curation:** Jaron Ras

339 **Formal analysis:** Jaron Ras

340 **Funding acquisition:** Jaron Ras

341 **Investigation:** Jaron Ras

342 **Methodology:** Jaron Ras, Elpidofos Soteriades, Denise Smith, Andre Kengne and Lloyd Leach

343 **Project administration:** Jaron Ras, Elpidofos Soteriades, Denise Smith, Andre Kengne and  
344 Lloyd Leach

345 **Resources:** Jaron Ras, Elpidofos Soteriades, Denise Smith, Andre Kengne and Lloyd Leach

346 **Supervision:** Elpidofos Soteriades, Denise Smith, Andre Kengne and Lloyd Leach

347 **Writing – original draft preparation:** Jaron Ras

348 **Writing – review and editing:** Elpidofos Soteriades, Denise Smith, Andre Kengne and Lloyd  
349 Leach

350

### 351 **Protocol Registration**

352 Details of the protocol for this systematic review were registered on PROSPERO

353 (CRD42022330510) and can be accessed at

354 [https://www.crd.york.ac.uk/prospero/display\\_record.php?RecordID=330510](https://www.crd.york.ac.uk/prospero/display_record.php?RecordID=330510)

355

356

### 357 **REFERENCES**

358

- 359 1 Li J, Wang Y, Jiang R, *et al.* Quantifying self-contained breathing apparatus on  
360 physiology and psychological responses during firefighting: a systematic review and  
361 meta-analysis. *International Journal of Occupational Safety and Ergonomics*  
362 Published Online First: 2022. doi:10.1080/10803548.2021.2024020
- 363 2 Smith DL, Haller JM, Benedict R, *et al.* Cardiac Strain Associated with High-rise  
364 Firefighting. 2015;:213–21. doi:10.1080/15459624.2014.970272
- 365 3 Smith DL, DeBlois JP, Kales SN, *et al.* Cardiovascular strain of firefighting and the  
366 risk of sudden cardiac events. *Exerc Sport Sci Rev* 2016;**44**:90–7.  
367 doi:10.1249/JES.0000000000000081
- 368 4 Smith DL, Barr DA, Kales SN. Extreme sacrifice: Sudden cardiac death in the US Fire  
369 Service. *Extrem Physiol Med* 2013;**2**:1–9. doi:10.1186/2046-7648-2-6
- 370 5 Smith DL, Haller JM, Benedict R, *et al.* Firefighter incident rehabilitation: Interpreting  
371 heart rate responses. *Prehospital Emergency Care* 2016;**20**:28–36.  
372 doi:10.3109/10903127.2015.1037477
- 373 6 Marcel-Millet P, Ravier G, Grospretre S, *et al.* Physiological responses and  
374 parasympathetic reactivation in rescue interventions: The effect of the breathing  
375 apparatus. *Scand J Med Sci Sports* 2018;**28**:2710–22.  
376 doi:<https://doi.org/10.1111/sms.13291>
- 377 7 Nazari G, Lu S, MacDermid JC. Quantifying physiological responses during simulated  
378 tasks among Canadian firefighters: A systematic review and meta-analysis. *J Mil*  
379 *Veteran Fam Health* 2021;**7**:55–75. doi:10.3138/JMVFH-2019-0063

- 380 8 Yang J, Teehan D, Farioli A, *et al.* Sudden cardiac death among firefighters  $\leq 45$  years  
381 of age in the United States. *American Journal of Cardiology* 2013;**112**:1962–7.  
382 doi:10.1016/j.amjcard.2013.08.029
- 383 9 Soares EMKVK, Smith D, Grossi Porto LG. Worldwide prevalence of obesity among  
384 firefighters: A systematic review protocol. *BMJ Open* 2020;**10**:1–5.  
385 doi:10.1136/bmjopen-2019-031282
- 386 10 Smith DL, Fehling PC, Frisch A, *et al.* The prevalence of cardiovascular disease risk  
387 factors and obesity in firefighters. *J Obes* 2012;**2012**. doi:10.1155/2012/908267
- 388 11 Risavi BL, Staszko J. Prevalence of Risk Factors for Coronary Artery Disease in  
389 Pennsylvania (USA) Firefighters. *Prehosp Disaster Med* 2015;**31**:102–7.  
390 doi:10.1017/S1049023X15005415
- 391 12 Ras J, Leach L. Prevalence of coronary artery disease risk factors in firefighters in the  
392 city of Cape Town fire and rescue service – A descriptive study. *J Public Health Res*  
393 2021;**10**. doi:10.4081/jphr.2021.2000
- 394 13 Damacena FC, Batista TJ, Ayres LR, *et al.* Obesity prevalence in Brazilian firefighters  
395 and the association of central obesity with personal, occupational and cardiovascular  
396 risk factors: a cross-sectional study. *BMJ Open* 2020;**10**:1–10. doi:10.1136/bmjopen-  
397 2019-032933
- 398 14 Savall A, Charles R, Bertholon A, *et al.* Volunteer and career French firefighters:  
399 Cardiovascular risk factors and cardiovascular risk assessment. *Eur J Prev Cardiol*  
400 2020;**27**:107–9. doi:10.1177/2047487319827463
- 401 15 Martin ZT, Schlaff RA, Hemenway JK, *et al.* Cardiovascular Disease Risk Factors and  
402 Physical Fitness in Volunteer Firefighters. *Int J Exerc Sci* 2019;**12**:764–  
403 76. <http://www.ncbi.nlm.nih.gov/pubmed/31156744> <http://www.pubmedcentral.nih.gov/articlerender.fcgi?artid=PMC6533096>
- 404 16 Soteriades ES, Smith DL, Tsismenakis AJ, *et al.* Cardiovascular disease in US  
405 firefighters: A systematic review. *Cardiol Rev* 2011;**19**:202–15.  
406 doi:10.1097/CRD.0b013e318215c105
- 407 17 Smith DL, Haller JM, Korre M, *et al.* The Relation of Emergency Duties to Cardiac  
408 Death Among US Firefighters. *American Journal of Cardiology* 2019;**123**:736–41.  
409 doi:10.1016/j.amjcard.2018.11.049
- 410 18 Farioli A, Yang J, Teehan D, *et al.* Duty-related risk of sudden cardiac death among  
411 young US firefighters. *Occup Med (Chic Ill)* 2014;**64**:428–35.  
412 doi:10.1093/occmed/kqu102
- 413 19 Ras J, Mosie D, Strauss M, *et al.* Knowledge of and attitudes toward health and  
414 cardiovascular disease risk factors among firefighters in Cape Town, South Africa. *J*  
415 *Public Health Res* 2021;**11**. doi:10.4081/jphr.2021.2307
- 416 20 Phelps SM, Drew-Nord DC, Neitzel RL, *et al.* Characteristics and Predictors of  
417 Occupational Injury Among Career Firefighters. *Workplace Health Saf* 2018;**66**:291–  
418 301. doi:10.1177/2165079917740595
- 419 21 Wynn P, Hawdon P. Cardiorespiratory fitness selection standard and occupational  
420 outcomes in trainee firefighters. 2012;:123–8. doi:10.1093/occmed/kqr206
- 421 22 McDonough SL, Phillips JS, Twilbeck TJ. Determining Best Practices to Reduce  
422 Occupational Health Risks in Firefighters. *The Journal of Strength & Conditioning*  
423 *Research* 2015;**29**. [https://journals.lww.com/nsca-](https://journals.lww.com/nsca-jscr/Fulltext/2015/07000/Determining_Best_Practices_to_Reduce_Occupational.34.aspx)  
424 [jscr/Fulltext/2015/07000/Determining\\_Best\\_Practices\\_to\\_Reduce\\_Occupational.34.as](https://journals.lww.com/nsca-jscr/Fulltext/2015/07000/Determining_Best_Practices_to_Reduce_Occupational.34.aspx)  
425 [px](https://journals.lww.com/nsca-jscr/Fulltext/2015/07000/Determining_Best_Practices_to_Reduce_Occupational.34.aspx)
- 426 23 Nazari G, Osifeso TA, MacDermid JC. Distribution of Number, Location of Pain and  
427 Comorbidities, and Determinants of Work Limitations among Firefighters. *Rehabil*  
428 *Res Pract* 2020;**2020**:1942513. doi:10.1155/2020/1942513
- 429

- 430 24 Nazari G, MacDermid JC, Sinden KE, *et al.* The Relationship between Physical  
431 Fitness and Simulated Firefighting Task Performance. *Rehabil Res Pract*  
432 2018;**2018**:1–7. doi:10.1155/2018/3234176
- 433 25 Bucala M, Sweet E. Obesity in the fire service: An inside look at the perceptions of  
434 firefighters towards obesity and other health issues. *Res Sq* Published Online First:  
435 2019. doi:10.21203/rs.2.15518/v1
- 436 26 Chu DJ, al Rifai M, Virani SS, *et al.* The relationship between cardiorespiratory  
437 fitness, cardiovascular risk factors and atherosclerosis. *Atherosclerosis* 2020;**304**:44–  
438 52. doi:<https://doi.org/10.1016/j.atherosclerosis.2020.04.019>
- 439 27 Tarp J, Støle AP, Blond K, *et al.* Cardiorespiratory fitness, muscular strength and risk  
440 of type 2 diabetes: a systematic review and meta-analysis. *Diabetologia*  
441 2019;**62**:1129–42. doi:10.1007/s00125-019-4867-4
- 442 28 Vega GL, Grundy SM, Barlow CE, *et al.* Association of triglyceride-to-high density  
443 lipoprotein cholesterol ratio to cardiorespiratory fitness in men. *J Clin Lipidol*  
444 2016;**10**:1414-1422.e1. doi:<https://doi.org/10.1016/j.jacl.2016.09.008>
- 445 29 Parto P, Lavie CJ, Swift D, *et al.* The role of cardiorespiratory fitness on plasma lipid  
446 levels. *Expert Rev Cardiovasc Ther* 2015;**13**:1177–83.  
447 doi:10.1586/14779072.2015.1092384
- 448 30 Stroup DF, Berlin JA, Morton SC, *et al.* Meta-analysis of Observational Studies in  
449 Epidemiology A Proposal for Reporting. *JAMA* 2000;**283**:2008–12.  
450 doi:10.1001/jama.283.15.2008
- 451 31 Brand RA. Editorial: Standards of Reporting: The CONSORT, QUORUM, and  
452 STROBE Guidelines. *Clin Orthop Relat Res* 2009;**467**:1393–4. doi:10.1007/s11999-  
453 009-0786-x
- 454 32 Moher D, Liberati A, Tetzlaff J, *et al.* Preferred Reporting Items for Systematic  
455 Reviews and Meta-Analyses: The PRISMA Statement. *PLoS Med*  
456 2009;**6**:e1000097. <https://doi.org/10.1371/journal.pmed.1000097>
- 457 33 Ouzzani M, Hammady H, Fedorowicz Z, *et al.* Rayyan-a web and mobile app for  
458 systematic reviews. *Syst Rev* 2016;**5**:1–10. doi:10.1186/s13643-016-0384-4
- 459 34 Collaboration C. Review manager (RevMan) version 5.3. *Copenhagen: The Nordic*  
460 *Cochrane Centre* 2014.
- 461 35 Downes MJ, Brennan ML, Williams HC, *et al.* Development of a critical appraisal tool  
462 to assess the quality of cross-sectional studies (AXIS). *BMJ Open* 2016;**6**:e011458.  
463 doi:10.1136/bmjopen-2016-011458
- 464 36 Sanderson S, Tatt ID, Higgins JPT. Tools for assessing quality and susceptibility to  
465 bias in observational studies in epidemiology: a systematic review and annotated  
466 bibliography. *Int J Epidemiol* 2007;**36**:666–76. doi:10.1093/ije/dym018
- 467 37 Harris JD, Quatman CE, Manring MM, *et al.* The American Journal of Sports  
468 Medicine P < P How to Write a Systematic Review. Published Online First: 2013.  
469 doi:10.1177/0363546513497567
- 470 38 Metelli S, Chaimani A. Challenges in meta- analyses with observational studies.  
471 2020;**83**–7. doi:10.1136/ebmental-2019-300129
- 472 39 Gurevitch J, Koricheva J, Nakagawa S, *et al.* Meta-analysis and the science of research  
473 synthesis. *Nature* 2018;**555**:175–82. doi:10.1038/nature25753
- 474 40 Akkaya-Hocagil T. Meta-analysis: Methods for health and experimental studies:  
475 Shahjahan Khan Springer Nature Singapore Pte. Ltd. 2020. pp. 293. *Biometrics*  
476 2022;**78**:414. doi:<https://doi.org/10.1111/biom.13605>
- 477 41 Haidich AB. Meta-analysis in medical research. *Hippokratia* 2010;**14**:29–  
478 37. <https://pubmed.ncbi.nlm.nih.gov/21487488>

- 479 42 Lin L. Comparison of four heterogeneity measures for meta-analysis. *J Eval Clin Pract*  
480 2020;**26**:376–84. doi:10.1111/jep.13159
- 481 43 Siddall AG, Stevenson RDM, Turner PJF, *et al.* Physical and Physiological  
482 Performance Determinants of a Firefighting Simulation Test. *J Occup Environ Med*  
483 2018;**60**:637–43. doi:10.1097/JOM.0000000000001313
- 484 44 Heimburg E von, Ingulf Medbø J, Sandsund M, *et al.* Performance on a Work-  
485 Simulating Firefighter Test Versus Approved Laboratory Tests for Firefighters and  
486 Applicants. *International Journal of Occupational Safety and Ergonomics*  
487 2013;**19**:227–43. doi:10.1080/10803548.2013.11076981
- 488 45 Skinner TL, Kelly VG, Boytar AN, *et al.* Aviation Rescue Firefighters physical fitness  
489 and predictors of task performance. *J Sci Med Sport* 2020;**23**:1228–33.  
490 doi:10.1016/j.jsams.2020.05.013
- 491 46 Vergnes J-N, Marchal-Sixou C, Nabet C, *et al.* Ethics in systematic reviews. *J Med*  
492 *Ethics* 2010;**36**:771 LP – 774. doi:10.1136/jme.2010.039941
- 493
- 494
- 495
